# Supplementary material for: Identification and isolation of multipotential neural progenitor cells from the subcortical white matter of the adult human brain
Source: Springer Nature journal article supplement (doi:10.1038/nm837), 2003-03-10
Supplement: 41591_2003_BFnm837_MOESM2_ESM.pdf [file 41591_2003_BFnm837_MOESM2_ESM.pdf]

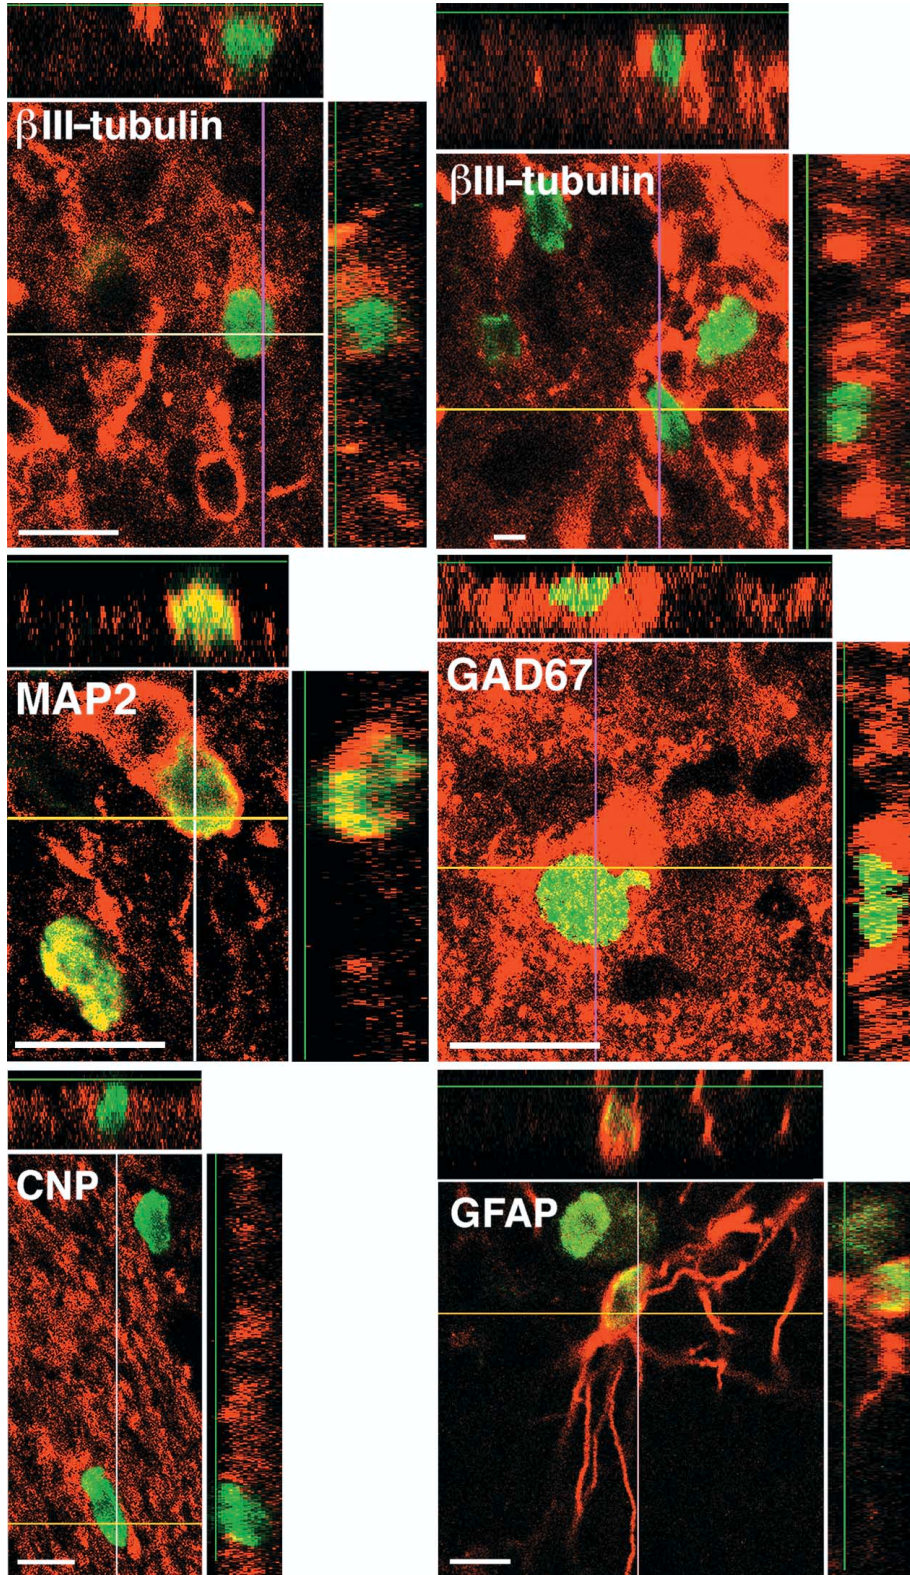

## Supplemental Fig. 2

Acutely sorted-human WMPCs engrafted into fetal rats gave rise to neurons and glia

Rats implanted at E17 with A2B5-sorted WMPCs were sacrificed a month after birth, their brains sectioned and immunostained first with anti-human nuclear antigen antibody (hNA, *green*) to localize the transplanted cells. A-B, (III-tubulin<sup>+</sup> neurons (*red*) were observed in the dorsolateral striatum adjacent to the take-off of the rostral migratory stream (RMS) in an E17 transplanted rat. C, a MAP-2<sup>+</sup> neuron (*red*) in the dorsal striatum; D, a GAD67<sup>+</sup> neuron (*red*) in the dorsal striatum; E, a CNP<sup>+</sup> oligodendrocyte (*red*) in the corpus callosum; and F, a GFAP<sup>+</sup> astrocyte (*red*) in the callosum.

Scale: A-F, 14  $\mu$ m.
